# Supplementary material for: Biodegradable hydrogels with photodynamic antibacterial activity promote wound healing and mitigate scar formation
Source: Royal Society of Chemistry journal article supplement (doi:10.1039/d2bm01493a), 2022-11-09
Supplement: d2bm01493a1.pdf [file d2bm01493a1.pdf]

## Supplemental Information

### **Biodegradable hydrogels with photodynamic antibacterial activity promote wound healing and mitigate scar formation**

Chen Zhang<sup>a</sup>, Dan Yang<sup>a</sup>, Tai-Bao Wang<sup>a</sup>, Xuan Nie<sup>b</sup>, Guang Chen<sup>b</sup>, Long-Hai Wang<sup>b</sup>, Ye-Zi You<sup>b\*</sup>, Qin Wang<sup>a\*</sup>

<sup>a</sup> Department of Otorhinolaryngology, Head and Neck Surgery, The First Affiliated Hospital of Anhui Medical University, Hefei, China.

<sup>b</sup> Department of Polymer Science and Engineering, University of Science and Technology of China, Hefei, China.

\*To whom correspondence should be addressed.

E-mail: wangqin@ahmu.edu.cn

E-mail: yzyou@ustc.edu.cn

## Supplementary Results

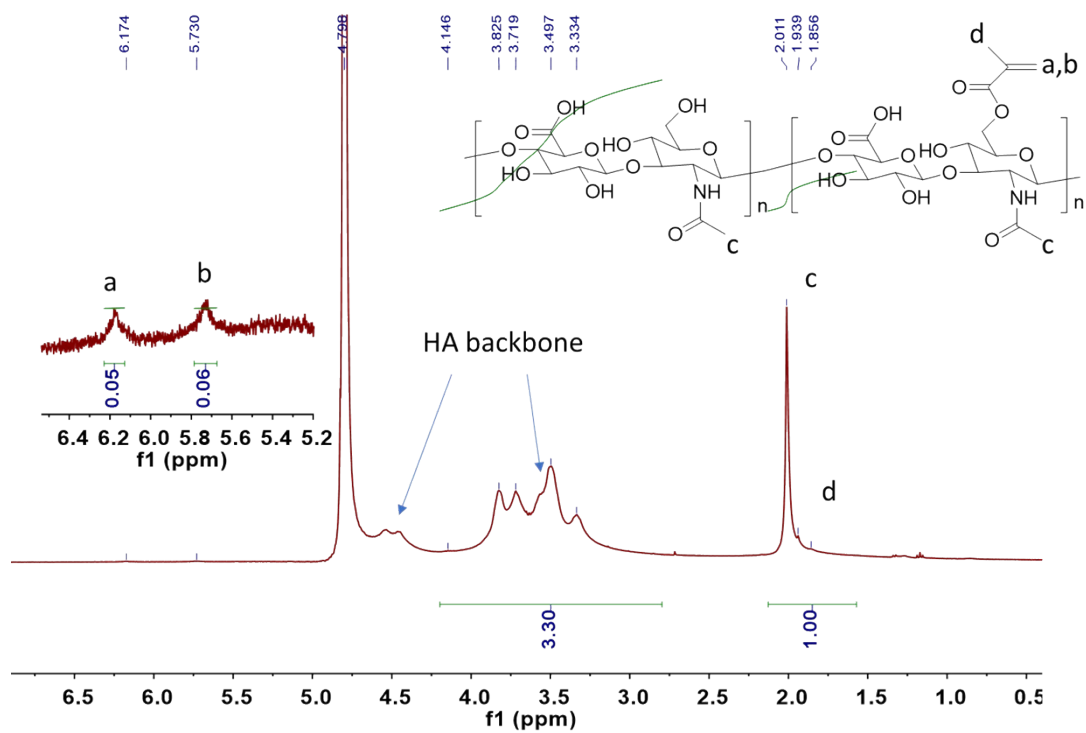

**Figure S1.**  $^1\text{H}$  NMR spectrum of HA-ene.

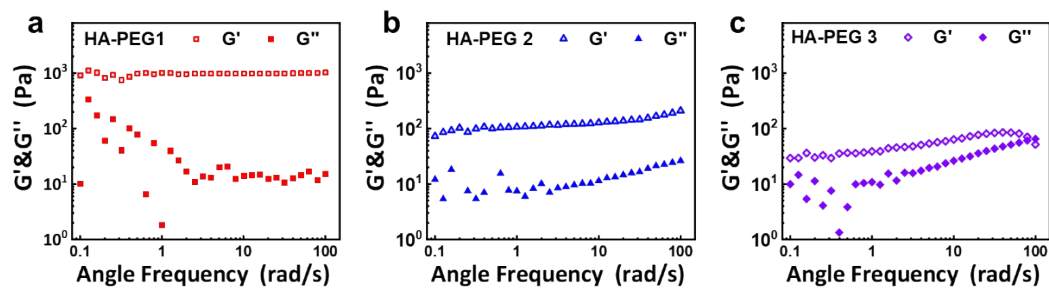

**Figure S2.** Rheology data (value of  $G'$  and  $G''$  of the hydrogel according to frequency) of HA hydrogel with different crosslinking degrees (The hyaluronic acid hydrogels prepared using 0.1, 0.2, and 0.3 g 10 wt% 4-arm PEG-SH solution were denoted as HA-PEG1, HA-PEG2 and HA-PEG3, respectively).

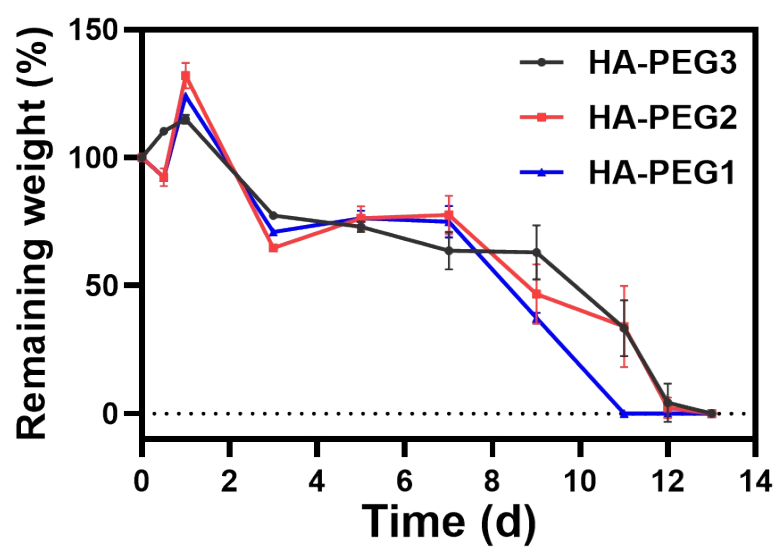

**Fig. S3.** The degradation of hydrogels in the presence of hyaluronidase solution.

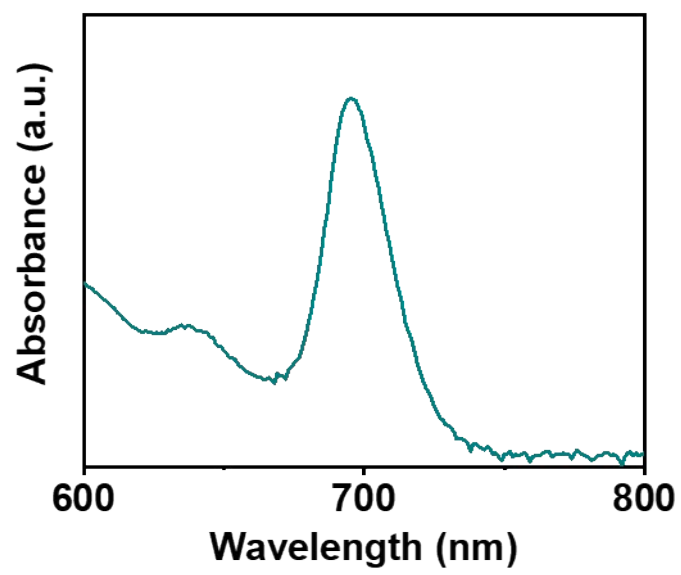

**Figure S4.** UV-vis absorption of VP.

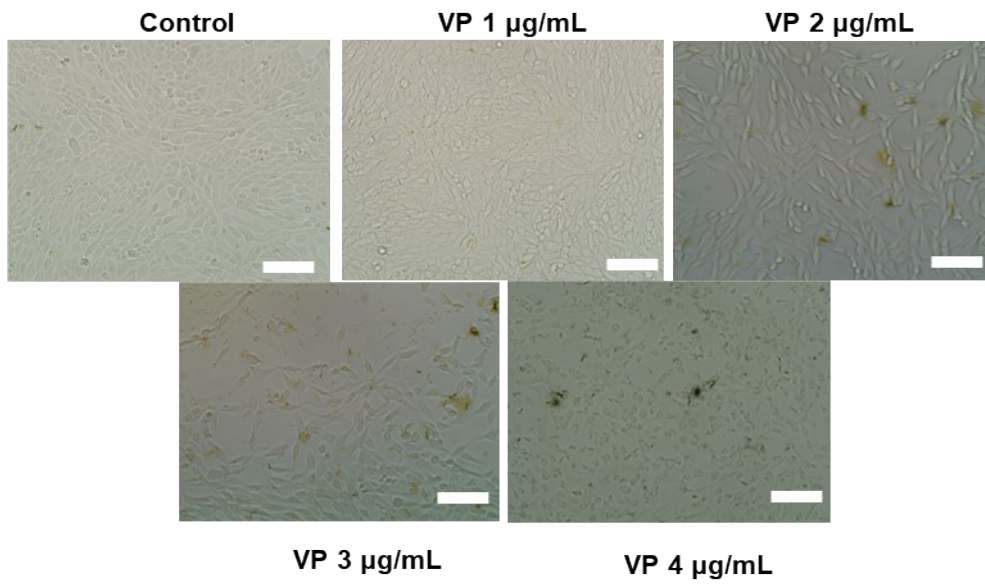

**Figure S5.** Cell morphology of 3T3 cells cultured with different concentrations of verteporfin (Scale bar: 200 µm).

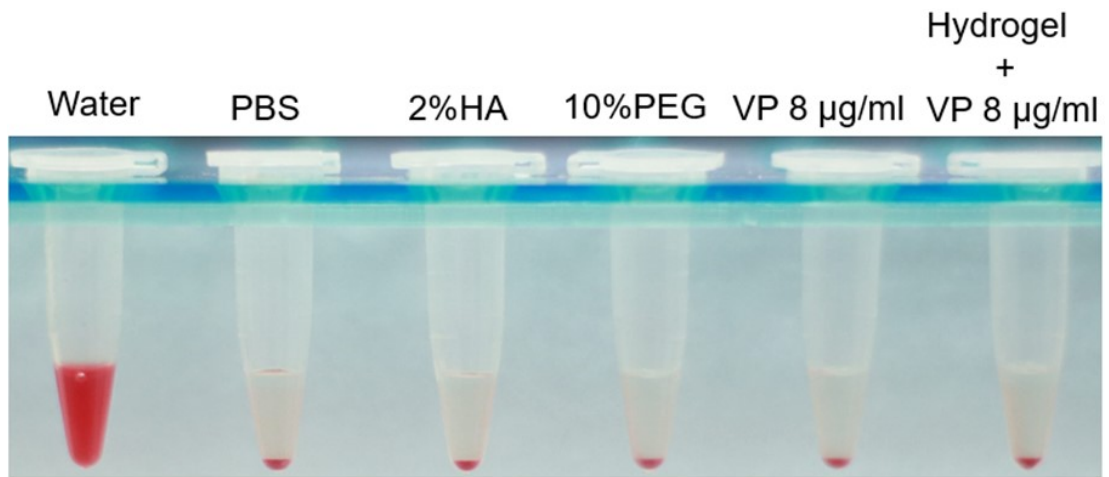

**Figure S6.** Hemolytic properties of all the components of VP-gel.

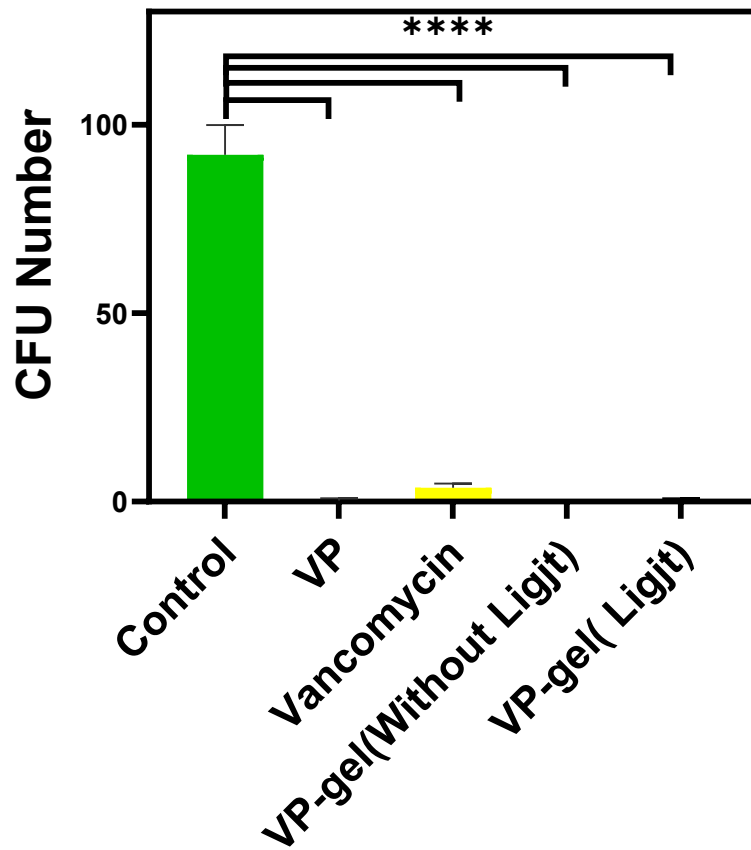

**Figure S7.** The histogram of the colony forming unit (CFU) number for MRSA was measured after growth on agar plates for a period of 24 h at 37 °C. All data are presented as the mean  $\pm$  SD (n = 3, \*p < 0.05). All statistical analyses were performed by Student's t test.



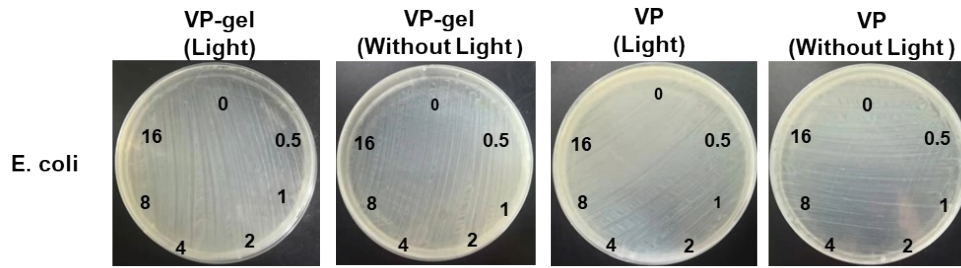

**Fig. S8.** Antibacterial activity of VP solution and VP-gel against *E. coli*. The labeled numbers in plates indicate the VP concentration ( $\mu\text{g/mL}$ ).

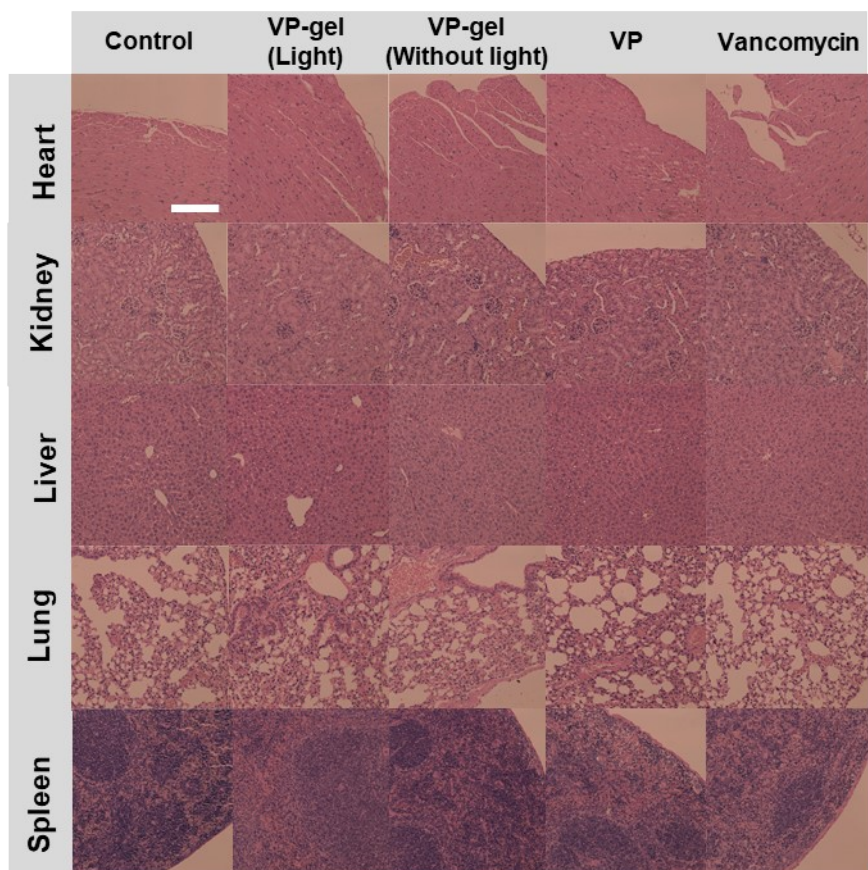

**Figure S9.** H&E staining images of tissue slices of major organs (heart, liver, spleen, lung, and kidney) with different treatment. Scale bar: 200  $\mu$ m.
